# Supplementary material for: Screening of In Vivo Activated Genes in Enterococcus faecalis during Insect and Mouse Infections and Growth in Urine
Source: PLoS One. 2010 Jul 29;5(7):e11879. doi: 10.1371/journal.pone.0011879 (PMC2912369; doi:10.1371/journal.pone.0011879)
Supplement: Table S2 — (0.02 MB XLS) [file pone.0011879.s002.xls]

## Sheet: Feuil1
	TABLE S2
	Strains, plasmids and sequences of primers used in this study.
	Strains
	Name	Genotype / Phenotype	Source
	E. coli VE14188	dam- strain	Serror, P.
	E. faecalis V583	Clinical isolate, VnR, TIGR sequenced strain.	[57]
	E. faecalis V583 V19	V583 derivative, plasmid-free strain, EmS.	Beanchour, A.
	E. faecalis V583 Lox1	V583 V19 derivative containing one copy of pLox1. EmS, TetR.	This study
	E. faecalis V583 Lox2	V583 V19 derivating containing one copy of the loxP-ermB-loxP-tetM cassette. EmR, TetS. Without mutation in loxP sites.	This study
	E. faecalis V583 Lox2ΔG	V583 V19 derivative containing one copy the loxP-ermB-loxP-tetM cassette. EmR, TetS. Mutation in the second loxP site.	This study
	E. faecalis RR02	rr02 insertional mutant of V583, TetR	[27]
	E. faecalis ΔTCS	ef_3196/7 deletion mutant of V19 strain	This study
	E. faecalis 377::Ery	ef_0377 insertional mutant of V19 strain, TetR	This study
	E. faecalis Δ377	ef_0377 deletion mutant of V19 strain	This study
	E. faecalis lox2:pCre2	Lox2 derivative strain carrying plasmid pCre2	This study
	E. faecalis lox2ΔG:pCre2	Lox2ΔG derivative strain carrying plasmid pCre2	This study
	E. faecalis lox2:Pivi1	Lox2 derivative strain carrying plasmid pCre2:ivi1	This study
	E. faecalis lox2:Pivi2	Lox2 derivative strain carrying plasmid pCre2:ivi2	This study
	E. faecalis lox2:Pivi3	Lox2 derivative strain carrying plasmid pCre2:ivi3	This study
	E. faecalis lox2:Pivi4	Lox2 derivative strain carrying plasmid pCre2:ivi4	This study
	E. faecalis lox2:Pivi5	Lox2 derivative strain carrying plasmid pCre2:ivi5	This study
	E. faecalis lox2ΔG:Pivi6	Lox2ΔG derivative strain carrying plasmid pCre2:ivi6	This study
	E. faecalis lox2ΔG:Pivi7	Lox2ΔG derivative strain carrying plasmid pCre2:ivi7	This study
	Plasmids
	Name	Genotype / Phenotype and use	Source or reference
	pBlueScript SK+	AmpR , pLME construction.	Stratagene.
	pNZ7125	CmR, pLME, pCre2 construction.	[17]
	pCU1	CmR	[58]
	pCre2	AmpR, CmR, PCU1 and pNZ7125 derivative used in the library construction. Cloning site: SmaI upstream from the gene cre.	This study.
	pLME	CmR, pBlueScript SK+ derivative with cat as reporter gene.	This study.
	pLox 0 and pLox 1	pLME derivatives	This study.
	pLox2ΔG	pLox1 derivative, with a deletion in the second loxP site.	This study.
	pLox2	pLox1 derivative, without mutation in the second loxP site.	This study.
	p3TET	Suicide vector for insertional mutagenesis, TetR	[27]
	pUCB30	Mutagenesis in E. faecalis, EmR	[51]
	pOri19	Vector for insertional mutagenesis	[54]
	pCre2:ivi1	pCre2 derivative horboring promoter Pivi1 cloned upstream from cre	This study.
	pCre2:ivi2	pCre2 derivative horboring promoter Pivi2 cloned upstream from cre	This study.
	pCre2:ivi3	pCre2 derivative horboring promoter Pivi3 cloned upstream from cre	This study.
	pCre2:ivi4	pCre2 derivative horboring promoter Pivi4 cloned upstream from cre	This study.
	pCre2:ivi5	pCre2 derivative horboring promoter Pivi5 cloned upstream from cre	This study.
	pCre2:ivi6	pCre2 derivative horboring promoter Pivi6 cloned upstream from cre	This study.
	pCre2:ivi7	pCre2 derivative horboring promoter Pivi7 cloned upstream from cre	This study.
	Primers
	Name	Sequence (5’-3’)	Use
	creR2	GTCCATCAGGTTCTTGCG	Primers framing the MCS of pCre2
	BglII-cre	ATAGTTTACCCCGTCAGC
	faecalis A ter	GCATCTGGGCCCTCTAGCTTAAGTAAAGAAACC (ApaI)	pLox0 insert construction
	faecalis B ter	AACCCAGAGCTCCATATTGAAGATTTGCATAATG (SacI)
	faecalis C ter	TAAATTGCACTTCTCTGTCGACTAATTAATTTGCCCAAC (SalI)
	faecalis D ter	AGAGAAGTGCAATTTAGCGGCCGCAGTTTTTTATTCTATTC (NotI)
	tet 1	CCGCTTCTGCAGGGAGGAAAATCACATG (PstI)	Amplification of the tetM gene
	tet 2	TTAAGCGCGGCCGCTGTGGTGGTTACG (NotI)
	erm 1	ATGTAAGAATTCCAGGAGTGATTACATGAAC (EcoRI)	Amplification of the ermB gene
	erm 2	AAGCGACTCGAGGAATTATTTCCTCCCG (XhoI)
	ext lox P1 ter	AAAGGGGTCGACGTGTGTTGATAGTGCAGTATC (SalI)	LoxP1 cassette construction
	ext rev lox P1	AAGGGCTGCAGCGTAGAATTCATAACTTCG (PstI, EcoRI)
	lox P1	GTTGATAGTGCAGTATCTTAAAATTTTGTGTATAATAGGAATTGAAGTTAAATTAGATG
	rev lox P1	GAATTCATAACTTCGTATAGCATACATTATACGAAGTTATGGTAGCATCTAATTTAAC (EcoRI)
	ext lox P2	GGCCCCTCGAGGGACTAG (XhoI)	LoxP2 cassette construction
	ext rev lox P2	GGGGCTGCAGTTATAACTTCGTATAGCATAC (PstI)
	lox P2	CCCCTCGAGGGACTAGGACATCAGTCATTCGACTGATGT CCTAGTCCTTTTTTATTTATAAC (XhoI)
	rev lox P2	CTTCGTATAGCATACATTATACGAAGTTATAAATAAAAAAGGACTAGGAC
	Photolyase	CCAGAAGAGGAAGCAGCTTATCG	Primers framing the integration region of pLox2 in E. faecalis genome
	katA	CCGTCATATGCATGGTTTTGG
	0153L	CCAATAACGCCAAGTGAGC	qRT-PCR Primers
	0153R	ACTGCGACAATTGCTTCTCC
	0154L	TCAGTGAAAGAACCGCTTGA
	0154R	TTCTGTATTCCCCTTCGCATA
	0175L	CAAGAATGGCTTGATTGTGC
	0175R	TTTCCCGTCTGCAGTCACTA
	0176L	CGTCGCTTCTGCAACATTTA
	0176R	CCCGCCGATAAATCCTACTT
	0330L	CAGTTGCCGAGAAAACTTGG
	0330R	CTTCACGTTGCTTTGGGTTT
	0418L	TGAATGAACAGGGCAAAACA
	0418R	CCAAAAAGCGACCATCTTTC
	0528L	GAGCATAGTGAATGTGCTTTGG
	0528R	TGGGCACCCCATATTTTTC
	0839L and 2975L	GTTTCACCCACAGGCAAAGT
	0839R and 2975R	TTTGATGGCGGTTTCGATAG
	1201L	ATTGGGACTCGGACAATCAC
	1201R	AGCTAGCAAATCGCGAAGAG
	1434L	GGCGTGCATTAATGTCCATA
	1434R	CTGAGCGTGACAAACCTGAC
	2959L	TGCTTCTCTCTGGGGTGTCT
	2959R	CGATTTCACCAACGGCTAAT
	2960L	GTGCCTCGGACTACAGAAAAA
	2960R	TTGAACTGCCAATTCCTCAA
	2987L	AGCCCTTCAATTAGCCAACA
	2987R	GCCATCAATTGGTGCTGTAA
	2988L	ACGATTGGCATGCCTGAAT
	2988R	GAGGGACATGCCCCAGTT
	3251L	TGACTGTGTTAGCGGAAACG
	3251R	GATCAAACAACGTCCCGTCT
	3324L	TTAGTGCCGATGGGTTTAGG
	3324R	TGCCCCAATCCCAATAAATA
	3325L	AATGTTGGTGATACGGTGTCC
	3325R	TGTTACCGTACCTGCTTTTCC
